# Supplementary material for: PERIOD Phosphoclusters Control Temperature Compensation of the Drosophila Circadian Clock
Source: Front Physiol. 2022 Jun 2;13:888262. doi: 10.3389/fphys.2022.888262 (PMC9201207; doi:10.3389/fphys.2022.888262)
Supplement: Supplementary file 1 [file DataSheet1.xlsx]

## Sheet: Phosphodegron-period
Temperature	29	25	20	18	29	25	20	18	29	25	20	18	29	25	20	18	29	25	20	18	29	25	20	18	29	25	20	18	29	25	20	18	29	25	20	18	29	25	20	18	29	25	20	18	29	25	20	18	29
Gentype	26_S45SI	26_S45SI	26_S45SI	26_S45SI	10_S45SII	10_S45SII	10_S45SII	10_S45SII	w1118	w1118	w1118	w1118	51_S45F	51_S45F	51_S45F	51_S45F	111.4G_S45F	111.4G_S45F	111.4G_S45F	111.4G_S45F	115.4G_S45F	115.4G_S45F	115.4G_S45F	115.4G_S45F	67_S45D	67_S45D	67_S45D	67_S45D	123_S45D	123_S45D	123_S45D	123_S45D	73_S45A	73_S45A	73_S45A	73_S45A	5H_S45A	5H_S45A	5H_S45A	5H_S45A	90_s45a	90_s45a	90_s45a	90_s45a	105/110S4445A	105/110S4445A	105/110S4445A	105/110S4445A	32A21_S4445A
	23.5	25	25.3	25.8	23	24.5	24.7	24.2	23.4	24.4	24.8	24.7	26.7	27.9	28.5	29.8	26.6	27.7	27.3	28.4	26.1	28.1	28.2	29.3	23.7	24.6	24.7	25.3	23.7	24.6	24.8	25	25.3	27.1	27.3	29.4	25.9	26.5	27.7	27.6	26.5	27.4	28.7	27.9	34.7	34.5	35.3	38	33.7
	23.4	25.4	25.2	25.1	24.2	24.8	24.2	24.4	23.6	24.4	24	24.9	25.4	27.7	29	29	26.7	27.2	29.2	28.8	26	28.1	28	27.7	24.2	24.6	23.7	24.7	24	24.7	25.4	25.2	26.2	27.6	27.5	28.7	25.7	26.5	26.7	27.7	26.6	27.1	27.9	28.7	34.8	36.4	37.5		34.1
	23.7	24.7	25	25.1	23.5	24.7	24.9	24.2	23.4	24.4	24.5	25	26.7	27.7	28.2	29.7	26.7	27.9	28	28.5	26.2	27.7	27.9	28.6	23.9	25.3	24.5	24.6	23.7	24.9	24.6	24.6	26	27.1	28.5	29.1	26.4	26.7	26.7	28.2	26.9	27	28.2	28.6	33.3	36.7	35.4		33.7
	23.6	25.3	24.4	25.5	23.9	24.8	24.2	24.2	23.4	24.4	23.7	24.8	26	28.3	28.4	29.5	26.2	27.1	27.8	29.7	26.4	27.6	27.5	28.8	24	24.6	25.5	24.6	23.7	24.5	25.4	24.8	26.2	26.9	28.7	28.9	25.7	26.9	27.1	27.7	26.7	27.5	26.8	28.3	33.9	36.7	33.8		34.2
	23.9	24.8	25	25.2	23.7	24.7	24.2	24.2	23.6	24.6	24.7	25.2	26.5	27.9	29.7	29	26.4	26.2	28.2	29.5	25.8	27.9	28.7	29.6	23.8	24.9	24.7	24.6	23.9	24.8	24.3	25.4	26.2	27.4	26.7	29	26.5	27.1	27.2	28.2	26.7	27.1	28.4	29.5	33.6	35.8	35.3		34.3
	23.7	25.1	24.2	24.7	23.7	24.8	24.7	24.4	23.8	24.6	25.5	24.7	27	27.6	29	29.2	26.2	26.7	28.5	29	25.3	27.2	28	29.1	24.4	24.5	24.5	25.3	24	24.6	25.2	24.7	26.2	27.3	27.3	28.3	26	26.7	27.8	29.2	26.3	27.7	27.5	28.9	34.8	35.7	34.7		34.3
	22.6	24.8	24.7	25.4	23.5	25.2	25	24.9	23.4	24.3	23.6	24.9	26.9	27.5	28.7	29	26.2	27.4	27.5	28.9	25.6	27.4	28.2	29.4	24.6	25.1	25.6	25.3	23.9	24.8	24.9	25	27.2	26.7	29.4	28.5	25.8	26.3	27.7	28.3	26.7	27	28.4	28.5	34.8	35.7	34.6
	23.6	24.6	24.7	24.9	24.4	24.9	24.4	24.6	23.9	24.5	23.9	24.7	26.5	28	28.7	28.9	26.2	27.8	28.1	28.5	26	27.2	28.7	29.1	24.4	25.1	24.5	24.9	24.3	24.9	25.5	24.5	26.3	27.2	29.7	29.8	26	27.2	27.7	28.2	26.4	26.3	27.9	28.8	34.3	36	35.5
	23.7	24.7	24.9	25.1	24.1	24.7	24.7	24.2	23.7	24.4	23.4	24.7	27.1	27.2	29.4	29.5	26		28	29.2	26.9	27.8	28.2	29.4	24.4	24.7	25.5	25	24.1	24.9	24.4	24.7	26.4	27.4	27.5	28	26.4	26.4	27	28.8	26.2	26.4	28.5	28.8	35.7	35.7	35.9
	24	24.5	25.5	25.2	23.1	24.7	24.9	24.4	23.8	24.4	23.6	25	26.2	27	28.7	29.4	26.5		28	28.5	26	27	27.8	28.5	24.2	25.1	24.4	24.9	23.8	24.6	24.9	24.8	26.9	26.7	27.5	28.4	26.2	26.7	26	28.2	26.2	26.6	27.8	27.9		36	35
	23.7	24.2	24.8	25.3	24.1	24.5	24.8	24.4	23.5	24.8	23.8	24.7	26.5	27.7	28.2	29.2	26.9		28.3	27.9	26.7	27.4	28	28	24.4	25	25	24.6	24.2	24.6	25.1	24.6	26.5	26.3	27.7	28.6	26		26.7	29.2	26.7	26.2	27.5	28.5			34.8
	23.9	24.9	25.1	25.1	23.8	24.6	24.7	24.5	23.7	25.3	23.5	24.7	26.2	27.2	28.6	29.7	26.5		28.9	28	26.7	28.3	28.5	28.4	24.2	25	25.5	25.3	23.1	24.9	24.7	26	26.3	27.9	28.9	28.6	26.5		26.3	29	26	26.7	28	29			34.3
	23.7	24.9	24.9	25.5	23.5	24.9	25.1	24.7	23.5	24.8	23.6	25.2	26.7	27.5	28.5	29.6	26.4		28.9		26	27.6	28.1	27.7	24	24.4	25.1	25.2	24.2	25.4	25.2	25.2	26.5	27.9	27.9	27.9	26.2		28	27.5	26.2	25.9	28.7	27.8			36.3
	23.5	24.9	24.7	24.8	23.7	24.4	24.9	24.7	23.4	24	23.7	24.9	27	28	28.6	28.5	26.3		27.7		26.6	27.1	28.6	28.4	23.7	25.1	24.8	25.3	23.7	24.6	25.1	24.6	26.4	26.5	27.4	29	26		27.5	27.6	26.4	26.7	28.1	27.6			36.8
	23.8	24.4	23.9	24.9	24.2	24.9	24.7	23.9	23.8	24	23.7	24	26.9	27.7	29.4	28.9	26.5		28.9		26.5	26.8	27.7	27	24	24.6	24.9	25.5	23.9	24.4	24.9	24.5	26.4	27	28	29	25.9		27.5	27.7	26.5	27	28	28.4			35.5
	23.9	24.4	24.7	25.2	24.2	24.7	24.7	24.4	23.9	24	23.6	24.9	26.9	27.7	29.1	29.2	26.4		27.5		26.4	27.5	29.1	28.1	24	24.9	25.2	24.9	23.7	24.7	24.7	25.2	26.6	28	28	28.3	26		27	28	26.7		28	28.2			34.7
	23.5	24.4	25	25.1	23.7	24.6	25.1	24	23.6	24	23.2	23.9	26.2	28	29.2	28.9	26.6		27.7		26.4	27	28	29.2	24	24.9	25.1	25	24.7	25.5	24.2	25.1	26.2	27.6	27.7	28.3	26		27.5	27.8	26.2		28	28.9
	23.6	24.6	24.7	24.2	24.7	24.6	24.1	23.5	23.5	24.1	23.4	24.4	26	27.9	28.6	28.2	26.4		28			26.8	27.9	29.5	24.2	24.6	25.4	24.4	23.1	25	24.9	24.5	25.7	28	27.4	28.7	26.2		27	27.2	25.9		27	27.8
	23	24.7	24.2	25.2	24.1	24.7	24.2	24.5	23.6	24.2	23.9	23.7	26.4	28.4	28.4	29			28.7			26.9	29.2	29	23.9	24.7	25	25.6	24	25	25	24.4	26.4	27.4	27.5	28.2	25.7		27.2		26		28.2	29.2
	24	24.9	25.4	25.2	24.1	24.7	24.7	24.9	23.7	24.1	23.7	24.3	26.4	27.7	28.7	29.2			28			28.1	28.7	27.9	24.1	25.1	24.4	25.2	23.7	24.4	25.7	23.7	24.6	27.7	27.2	28.7	25.9		27.2		26.2		28.2	27.4
	23.7	25.2	24.7	25.8	23.9	24.9	24.7	25.7	23.8	24.6	23.4	23.9	26.5	27.1	28.4	28.4			29.5				27.4	29.4	23	24.7	25	25	23.9	25.3	24.7	24.3	25.8	27.2	28.2	28.3	25.7		27.3		26.2		27.7	28.2
	23.9	25.1	24.9	25.5	24	24.8	24.3	23.9	23.5	24.2	25.7	24.6	26.7	27	28.7	28.5			28.1				28.7		24	24.9	24.9	24.8	24.1	24.8	24.8	24.2	26.5	27	30.1	27.7	26.5		27		25.7		27.3
	23.9	24.9	24.2	25.5	24.1	24.3	24.2	24.4	23.2	24.3	24.9	25.1	26.7	27.4	28.4	28.9			28.2				28.7		23.7	24.7	24.7	25	23.5	24.8	24.9	24.3	25.7	26.9	27.9	29.1	25.9		27.5		26		26.3
	24.2	24.8	25.4	24.9	24.4	24.7	25.5	25.4	23.4	25.4	24.6	23.5	26.5	27.9	29	29.4			27.9				27.2		24.1	25.1	24.7	24.9	24.1	25.4	24.9	24.8	26.2	27.4	28	28.2	26.2		27.6		26.2		27.8
	24	25.3	25.1	24.5	24	24.7	23.9	24.2	23.7	24.4	24.2	24.5	26.9	27.8	28.4	28.9			28.1				29		24	25.2	25.4	25.2	24.7	25.1	24.2	24.8	26.2	26.3	28.3	27.6	25.9		27.5		26.6		27.7
	23.7	25.2	25.5	25.6	24.2	24.9	24.2	24.7	23.6	24.5	24.7	25	26.7	28.2	28.4	28.7							28.9		24.2	25.1	24.2	24.6	24.2	24.6	25	24.9	26.7	26.7	27.8	29.9	26		27.2		26		27.5
	23.7	23.8	24.9	24.4	22.8	24.6	24.4	24.9	23.9	24.3	24.4	24.2	26.9		28.2	29.9							28.7		24.2	24.6	24.8	24.9	24.4	25.3	24.4	24.8	26.3	27.2	27.6	28.4	25.7		27				27.7
	24.2	24.4	25	25.5	24.2	24.9	24	24.3	23.4	24.4	24	23.7	26.7		27.8	29.2							28.8		24.2	24.9	25.4	24.9	24	25.2	24	25	26.7	27.6	27.9	28.7	25.9		27.5				27.5
	24.1	25.5	25.7	26	23.1	25.3	24.5	24.8	23.4	24	25.5	24.9	26.7		29.2	29.7							29.1		23.7	25.4	24	25.4	24.4	25.2	24	24.6	26.9	27.2	27.4	28	26.4		27.2				28
	23.9	25.4	24.5	25.7	23.7	25	24.1	25	23.6	24.6	24.9	23.7	26.5		27.7	29							27.8		24.2	24.7	24.1	24.9	24.2	25.2	24.7	25	26.3		27.5	28.6	25.9		27.2				27.9
	23.8	25.1	24.6	24	24	24.9	23.9	24.9	23.9	23.7	24.2	24.2	26.6		28.7	29.5							28.5		23.9	25	24.2	25.9	24.4	25.2	24.7	24.4	26.5		28.8	27.8	26.4		27				27.3
	24.2	25.4	23.8	24.3	24.1	25.5	24.2	25.3	23.6	24.1	24.9	24.9	26.9		28.5	30.3							28.2		24.2	25.1	24.7	24.7	24.4	25.2	24.8	25.1	26.5		27.5	27.9	26.1		28.7				26.7
	23.6	25.2	25	24.6	23.7	25.2	24.2	24.7	23.7	24.6	26.2		27.2		28.5	29.4							28.8		24		24	25.5	24.4	25.7	25.3	24.5	26.4		28.5	28.2	26.3		27				27.7
	23.9	25.4	25.2	25.2	23.9	25	24.5	25	23.6	23.9	24.2		26.4		28.9	29.2							27.7		23.9		25.2	24.8	23.9	24.7	24	25	26.2		27.7	28.3	25.2		27.2				27.2
	23.9	25.2	24.3	24.3	24.3	25.1	24.7	25.3	23.5	24.2	24.7				28.7	29.2							28.9		24		24.5	24.9	23.5	25.6	25	24.9	26.7		27.9	28.8	26						28.7
	23.5	24.7	25	25.5	23.7	25	24	25.8	23.6	24.4	24.2				29.2	29									24.2		24.9	24.6	24.2	24.8	24.3	24.9	26.2		28.7	28.7	25.7						28.2
	24.2	25.4	25.1		23.9	25.1	24.6	24.7	23.6	24.2	24.5				28.7	29.6									24		24.9	24.6	23.5	25.4	25.2	25			27.7	28.8	25.6						27.7
	24.3	25.2	24.3		23.9	25	24.9	25	23.7	24.1	24.4				28.5	29.4									24.4		24.7	25.3	24.5	24.9	25	24.9			28	28.5							28
	24.4	25.5	24.7		23.9	25	25.5	24.5	23.6	24.8	27.2				29	29.7											24.5	24.4	22.9	25.1	25.1	24.5			28.2	28.8							28.4
	24.1	25.2	25.5		24	25.6	25	24	23.5	24.6	23.9				29	29.2											24.8	24.9	24.4	25.2	24.9	25.3			28	28.1							28.2
	24.2	25.7	24.7		23.9	25.1	24.7	25	23.4	25	23.9				29.8	29.8											25	24.6	24.2	25.2	24.7	24.9			28.3	28.1							27.6
	23.9	25.4	25.2		23.7	25.3	25	24.9	24	24.6	24.2				28.5	30.1											24.6	24.7	24.2	25.2	25	25.5			27.7	29							28.3
	23.8	25.8	24.7		23.9	25.7	25.2	24.2	23.5	24.9					28.3	28.7											24.1	24.8	24.4	24.9	24.8	24.7			28.7	28.6							28.5
	23.5	25.2	25.6		23.9	25.4	24.5	25.2	23.6	24.7					28.2	29.6											25	24.7	24.2	24.7	24.7	24.7			28.5	28.1							27.7
	24.7	25.1	25		24.1	25.2	25.2	25	23.4	25.1					28.6	28.5											24.6	25.2	24.2	25	25	24.2			27.7	28.6							27.8
	24.1		25.4		24.1	25.1	24.9	25	23.9	24.2					28.7	29.6											24.1	24.7	23.9	24.7	25.1	24.9			28.5	28							27.3
	24.4		25.4		23.7	25.2	25.7	25	23.6	24.4					28.2	29.2											24.7	24.9	23.8	25.1	24.2	24.9			27.5	28.4
	24.1		25.6		24.1	24.9	24.9	25.5	23.6	25.5					29.6	29.3											25.7	25.2	24.4	24.5	25	25.1			28.3	28.2
	23.9		24.9		24.4	25.1	25.5	25.2	23.8	24.9					30.2	29.4											24.6	24.6	23.7	24.5	25	25.1			27.8	28.9
	24.2		24.9		23.9	24.6	25.4	25.4	23.8	24.9					28.9	29.9											25	24.6	23.3	24.9	24.9	24.2			28.1	28.8
	22.8		26.3		24	24.8	25.1		23.6	24.4					29.9	28.7											25.1	25.7	24.2	24.6	24.5	25.1			28.1	29.1
	23.9		25.9		24.2	24.9	25.2		23.6	24.5					28.5	28.7											25.2	25.2	23.2	24.9	24.6				27.8	28.9
	24.1		25.4		24.4	25	25.2		23.8	25					29.1	29.5											24.8	24.4	23.7	24.7	25.3				28.2	28.3
	24.2		24.2		23.9	25.2	24.8		23.6						28	29.9											25.6	24.8		24.5	24.4				27.7	27.9
	24		25.2		23.7	25	25		23.6						28.2												25.1	25.1		25.2	26.7				28.7	28.4
	23.9		24.7		24.1	24.8	25.8		23.7						27.8												25.6	24.9		25	24.2				27.9	28.5
	23.9		24.4		24.1	23.8	25.4		23.8						28.5												25.2	24.6		24.3	24.9				27.9
	23.9		25.7		24.1	24.9	24.5		23.6						28												24.9	24.7		24.6	24.2				27.7
	23.8		24.6		24	25.5	25.5		23.4						28.5												25				24.9				29.2
	24.2		24.4		24.3	25.1	24.7		23.7						29.5												25.2				25				27.5
	24.2		24.9			25.3	25.5		23.6						28.9												25				24.9				28.1
	24.2		24.2				25.2		23.8						28.5												24.7				25.1				27.7
	24.2		24.9				24.7		23.7						29.4												25.2				24.6				27.7
	24.2		25.4				24.5		23.8						28.5												24.7				24.5				28.7
	23.7		24.9						23.6						29.2												24.9				24.9				28.2
	24		24.7						23.8						27.8												23.9				24.2				27.6
	24.1		24.9						23.6						27.5												24.5				24.6				27.8
	24		24.9						23.4																		24.9				24.9				28.5
	24.1		24.2						23.4																		24.9				25.3				28
	23.9		24.7						23.5																		24.5				24.4				27.2
	23.7		24.7						23.8																		25.2				25.1				27.7
			25						23.2																		25				24.9				27.1
			25.2						23.7																		25.4				24.6				29.2
			24.4						23.8																						24.6				27.5
			24.4						23.7																						24.9				29.6
			24						23.4																						24.9				28
			24.2						23.4																						24.9				28.2
			25.4						23.9																						24.9				28.2
			24.4						23.2																						24.4
			25						23.4																						24
			24						23.6																						24
			25						23.6																						24.6
			24.1						23.6																						24.9
			24.4						23.6																						24.7
			24.5						23.6																						24.7
									23.6																						24.7
									23.5																						25.1
									23.6																						24.4
									23.6
									23.4
									23.6
									23.7
									23.6
[truncated: 44 more columns]

## Sheet: Phosphodegron-power
	S45S_1				S45S_2				w1118		w1118		51_S45F				111_S45F				115_S45F				67_S45D				122 S45D				73_S45A				5_S45A				90_S45A				29_S44A				20_S44A
Temperature	29	25	20	18	29	25	20	18	29	25	20	18	29	25	20	18	29	25	20	18	29	25	20	18	29	25	20	18	29	25	20	18	29		20		29	25	20	18	29	25	20	18	29	25	20	18	29
	90.1	62.9	53.2	127.1	60.1	118.1	25.4	105.1	68.4	74.8	40	82.6	39.9	54.9	48.1	50.9	53	129	39.2	22.4	51.3	126.2	82	67.4	23.7	57.2	60.2	112.5	53	70.5	36	134.6	62.1	149.6	73.8	98.7	33.3	41.8	47.5	45.9	61.6	85.1	53.5	65.1					77.9
	28.9	38.9	37.4	138.5	67.7	156.3	50.6	22.8	126.8	126.5	55.6	52.9	49.8	102.5	45	94.7	36.9	64.6	28	57.2	57.1	74.5	62.8	49.1	81.5	60.7	59	76.9	89.8	120.4	36.7	103.5	51.7	74.4	56.3	131.3	43.6	59	60.5	43.5	80.5	152	37.8	55.3	54.6	120.8	81	77.2	80.8
	101.8	128.6	62.1	151.4	71.9	96.4	21.1	127.7	101.9	111.2	22.7	160.1	53.6	87.9	38.7	82	27.6	31.2	55	71.9	37.3	76.7	56.2	63.4	60.1	87.4	40.6	101.9	76.6	102.2	31	84.7	54.5	83.6	73.2	75.2	84.4	78.7	55.2	36.4	24.2	101.1	40	61.9	98	124.5	54.6	95.1	80.7
	96.2	49.1	40.2	85.3	40.7	103.5	20.3	65.2	77.9	101.1	37	102	54.9	21.5	21.3	39.4	60.2	20.9	23.6	32.5	67.8	66.8	45.8	91.2	58.3	107.4	41.2	85.5	51.9	82	77.5	51.6	54.4	132.2	67.5	86.3	43.6	52.9	47.6	35.5	29.7	129.3	26.1	62.3	85.6	131.2	75.7	145.2	32.1
	50.5	144.9	48.5	28.1	75.2	88.6	21.2	62.7	94.9	111.9	47	139.6	49.5	104.2	43.7	92.6	59.8	57.5	29.7	39.5	28.3	103.5	67.2	66.4	62.3	132	63.7	98.8	33.4	110.4	55.6	81.4	21.2	33.9	96.3	77.7	67.6	44.5	62.2	58.7	63.2	140.2	36.4	38.8	85.3	126.7	82.1	95.4	51.8
	98.2	96.4	33.4	49.5	42.5	100.5	26	86.6	55.1	120.3	40.1	70.2	63.5	132	47.3	48.7	38.7	51.8	39.7	34.5	42.6	103.2	74.3	59.9	30.1	139.1	26	116.4	56.3	75.1	45.4	86.6	21.9	83.3	33.2	64.7	46.7	52.6	39.2	34.4	37.1	44.5	47	67.6	56.6	83.6	35.9	163.9	90.6
	64.4	104.9	78.9	131.5	63.8	65	21.5	54.8	109.3	72.9	23.8	84.7	22.8	119.2	64.6	103.3	68.9	66.8	47.2	26.9	95.3	74.1	45.5	89.8	75.8	107.2	38.7	76.4	22.5	79.1	63.5	84.4	22.8	65.2	44	68.7	38.7	51.7	28.6	111.8	34.7	163.7	76.5	104	90.2	95.7	60	143.5	78.7
	74.3	69.1	30.9	90.7	79.5	63.4	35.6	83.7	105.3	119.9	39.3	90	87.5	45.4	47.6	129.1	76	32.7	40.1	81.5	20.5	57.5	55	52.7	72.5	103.3	28.1	138.2	89.4	105.8	53.6	54.9	52.5	98.4	49.6	95.8	64	72.2	36	35.7	29.9	55.4	24.5	97	85.1	57.8	88.4	123.9	77.5
	42	55.8	50.3	52.1	78.5	126.8	35.4	80	108.2	103.9	20.8	24.7	66.1	55.8	55.6	54.1	42.4		28.3	28.1	51.8	38.8	76	89.7	44.6	83.9	58.2	83.3	50.8	67	49.2	38.9	30	37.7	21.8	70.3	38.5	41.2	32.5	88.8	21.7	45.3	54.8	83.5	30.2	86.8	43.6	60.8	44.1
	47.1	65.7	65.3	72.1	99.4	101	28.7	66.7	62.2	108.9	54.9	79.1	32.3	50.3	32	104.8	58.8		53.9	28.8	54	85.2	90.8	88.3	65.3	103	31	117.5	53.4	83.2	22.4	101.4	47.8	77.5	35	53.6	35.1	37.1	68.1	24.4	42.2	54.7	41.2	155.6	44	87.8	51.9	68.9	34.1
	69.7	61.3	57.2	153.3	82.7	90.9	20.8	129.1	103.8	93.6	37	68	71	125.6	83.1	67	48.3		22.7	40.2	40.8	102.7	62.8	22.1	52.5	131.1	65.5	87.9	46.3	93.6	24	84.2	55.7	57	30.6	99.4	60.3		86.1	42.8	55.7	65.4	37.2	107.8	49.2	104.3	77.3	66.6	59.9
	83.1	65.2	30	113.4	91.2	144.1	26.4	80.6	80.4	110.6	52.7	36.3	25.2	33.5	43.2	101.2	34.4		45.6	22.9	45.8	127.5	23.8	63.6	38.2	52.3	72.1	123.6	52.7	75.9	72.5	75.3	52	65	35.1	138.5	42.6		25.1	20.5	38.8	64.5	56.2	67.7	51	96.1	39.1	49.6	26.7
	64.3	48.9	52.7	55.4	94.1	105.6	28.8	121.2	84.9	126.2	41.8	43.4	39.5	43.4	38.1	50.4	57.4		28		63	88.2	27.9	75.9	27.4	114.5	50.1	147.8	41.9	78.6	55.7	35.3	29.1	35.9	49.2	42.7	37.3		50.6	27.6	34.5	76.3	28.3	72	62.9	85.9	73.7	56	58.8
	103.9	62.6	59.8	94.7	107.3	53.1	28.2	55.8	98	103.3	38	53.7	56.3	47	31.8	105.5	49.1		25.5		50.4	60.5	64.7	41.6	33.8	70.6	41.6	54.6	36.5	90.8	60.2	44.9	38.7	82.9	36.2	102.9	72.5		26.3	45.9	73.3	58.1	69.5	110	41.8	83	53.4	51.7	80.9
	65.9	100	50.6	69.6	68.3	106.4	32.1	95.3	28.8	86.6	23.3	61.4	41.6	74.8	53.3	61.8	29.8		20.9		100.5	89.5	37.5	62.8	36.5	127.2	23.6	106.8	73	93.5	43.8	66.4	39.5	104.4	36.8	56.7	79.3		26.3	50.1	41.8	76.5	44.6	62.5	77.1	88.3	58	68.3	93.7
	20.5	74.1	40.8	45.5	61.7	80.9	32.3	29.6	97	46.4	41	47.6	34.1	84.9	53.2	73.4	38.8		46.3		53.9	78.1	35.2	31.2	65.7	95.4	36.2	119.2	52.5	53.9	53.7	82.7	42.4	90.4	54.8	107.3	31.9		52	54.5	38.1		22.2	41.3	77.2	96.5	82.1	78.7	59.7
	70.4	87	62.9	55.7	56.9	59.3	35.4	48.5	52.5	36.9	42.6	51	20.2	75.2	76.5	55.8	70		24.1		36.2	21.3	47.4	60.3	67.3	64.8	52.7	117.2	77.6	167	62.4	57.9	32.8		37.8	44.2	24		63.3	22.6	21.6		35.5	42.1	43	100.7	69.1	38.1	69.2
	49.6	59.6	41.2	65.3	46.2	80	58.4	96.2	66.1	36.7	53.8	76.2	31.7	40.6	26.9	82.5	80		30.1			31.9	46.6	31.2	73.4	45.8	55.5	105.4	43.5	106.9	38.9	52	50.3		23.5	24.3	64.2		57.6	31.3	45		23.2	41	67.3	62.8	47.4	70.1	50.9
	103.7	71.9	28.9	53.6	57.5	74.2	27.7	134.1	55	65.3	28.6	62.9	29.8	93.1	58.4	44.9			38.7			92	50.7	23.3	56.9	75.8	46.3	104.1	54.8	40.1	41.8	92.1	68.8		26.4	29.3	40.8		31.9		35		79.7	47.2	41.7	51.3	25	42.6	76.5
	21.7	57.6	57.6	70.6	64.2	55.7	24.3	53.3	54.3	53.2	75.8	45.8	49	101	34.1	32.5			61.6			28	45.3	27.4	68.1	68.9	21.3	117.2	45.8	120.7	22.7	34.5	67		52.8	39.4	81.7		51.1		56.7		46.8	40.4	94	84.2	54.2	20.9	42.5
	67.5	85.4	47.7	61.1	65.9	55.2	20.9	95.9	63.1	73	69.4	78.1	59.7	36.2	59.9	92.1			43.8				84.8	43.2	71.8	96.5	106.3	67.2	34.5	103.5	33.4	78.8	40.3		62.2	38.9	53.6		25		55.7		76.9	35.6	75.3	96.2	63.1	35.7	88.5
	55.5	68.5	41	41.4	30.8	55.3	38.7	116.3	99.6	63.2	35.2	30	40.3	96.7	32.8	64.5			40.6				38.2		76.9	76.7	43.6	81.3	30.7	110.1	38.6	56.9	23.3		57.7	73.1	56.3		54.4		40.1		85.9		66	97.7	74.1	29.5	75
	55.6	78.1	38.8	39.5	41.2	92.2	55.8	141	35.8	59.5	55.1	79.7	58.3	60.2	37.5	60.8			23.7				48		88.6	73.9	48.3	100.9	37.9	106.2	26.9	31	47.1		62.2	36.8	25		62.2		41.8		27.1		63.2	76.2	40.7		76.3
	60.8	81.6	62.3	80.3	72.2	69.9	21.7	71.7	66.2	85.8	43.8	100.7	79.4	68.7	27.9	68.5			20.7				75.3		44	69.5	79.2	133.7	47.2	56.6	77.2	31.1	71.6		70.2	62.3	33.1		26.6		58.3		72.2		96.5	85.4	72.2		56
	117.1	36.4	62.3	41.8	46.4	42	39	48.1	49.4	72.4	24.9	62.3	100.8	35.7	68.6	97.6			32.2				53.5		67.6	68.6	38.2	130.8	92.6	59.5	91.9	107.7			48.1	52	25.8		34.5		70.7		48.8		70	34.9	27		75.5
	79.8	29.9	38.8	44.2	58.6	82.5	24	35.5	110.3	63.4	27.9	42.6	73.9	43.3	37.2	83.6							73.6		72.1	72.6	63.6	63.3	55.8	24	62.3	116.4			64.5	22.6	61.9		23.6		64.9		34.6		62.9	102.6	40.2		41.9
	38.4	48.3	74.8	23.4	81.2	84.7	30.4	54.7	36	64.5	20.4	37.9	56.9		72.2	113.5							82.8		37.2	74.3	39.2	90	84.3	43	92.2	95.2			59	51.8	32.9		75.4				21.4		100.3	84.8	20.1		52.4
	52.8	29.1	51.6	33.4	77.4	125.5	38.9	23	75.7	87.6	56.8	36.8	64.6		49.5	69.6							75.6		72.3	89.7	55.7	135.9	61.7	65.6	47.8	91.3			32.1	33.1	85.6		34.1				37.9		57.8	84.7	28.2		44.2
	51.9	70.2	59.2	21.3	60.9	48.1	83.8	24.9	74.3	73.4	49	39.5	39.4		39.6	59.9							48.4		85	45.2	38.4	126.5	69.2	58.7	61.7	71.3			38.2	63.9	75.7		31.8				52.4		31.5		55.6		61.5
	84.8	60.4	31.4	42.3	40.3	99.2	54.7	25.7	98.6	35.5	92.5	30.3	71.9		25.3	59.9							57.4		40	79.4	58.8	59	47.7	76.3	34.6	73			61.4	91.8	74.2		33.3				64.2		77.2		58.4		56.1
	28.5	88.8	56.7	40.9	101.6	71.6	46.1	73.9	88.2	68.7	77.9	23.9	47		27.2	31.2							21.7		71.5	71.5	22.5	68.3	44.7		35.3	126.8			53.6		32.6		49.6				81.4		46.3		45.1		63.7
	107	74.5	85.6	23	62.4	49.8	55.9	45.4	44	56.7	112.9	57.9	79.1		22.6	37.9							75.2		44.8	45.1	41.4	45.7	91.9		60.9	139.1			45.8		88.5		52.5				73.2		70.9		80		62.1
	85.8	69.4	48.6	47.7	70.1	78.7	46	23.2	99.5	64.3	60.9		32.8		28.7	40.4							49.7		32.4		67	77	68.7		50.4	129.8			29.2		37.2		75.9				40.2		95.7		41.2		22.3
	71.7	59.5	75.4	30.9	35	76	36.7	75.3	62.5	86.9	100.8		28.3		21.1	50.8							59		43.7		41.5	66.5	48.1		69.7	94.6			28.6		77.8		34.6				75.2		56.6		70.9		91.5
	57.2	25.1	66.8	51.7	51.5	79.1	21.9	41.2	67	76.6	58.9				65.4	101.7							43.7		50.2		30.2	67.1	74.6		76.4	93.3			55.5		84.9						54		57		69.6		72.9
	74.4	80.4	20.2	71.8	36.5	48.9	61.2	25.8	57.7	77.9	91.1				72.2	50.2									58.7		60.8	49.9	52.5		76.4	56.2			63.5		45.6						44.6		87.4		20.3		84.2
	56.4	50.3	26.9		62.6	63.2	29.5	76.3	68.3	28.5					21	69.8									62.5		68.6	56.2	24		57.2	45			95.8		51.4						72.9		91.7				79.8
	69.7	70.8	32.2		71.7	59.1	34.8	66.2	49.9	92.1	104				37.6	59.6									61.4		62.4	73.7	62.8		52.9	89.7			63.9								31.7		80.3
	44.4	37	58		80.1	74.5	25.9	53.6	69	72.7	34.4				25.9	72.5											74	42.2	49.2		58.3	55.3			47.6								60.9		93.4
	70.9	53.4	41.1		53.7	75.2	22.9	34.7	82.3	87.7	57.7				66.9	58.3											52	69.6	53.1		49.3	57.8			33								58.7
	39.1	72.7	49.3		93	76.8	40.1	63	39.8	78.4	69.9				33.1	50.2											35.3	31.1	80.7		31.1	63.7			51.5								66.4		37	116		64
	61.1	62.2	28.9		66.8	67.1	43.3	22.2	50.2	75.7	107.7				48.7	38.1											54.1	72.3	58.6		78.8	64.8			51.7								34.3		70.2	77.1		29.8
	41.5	47.2	56.3		63.6	77.3	62.9	45.2	22	52.6	94.7				57.6	71.9											61.8	65.9	73.6		42.5	29.8			44.7								50.8		30.3	110.3		128.9
	61.2	79.8	32.8		98	79.4	34.6	28.5	99.6	53.3					35.9	51											47.9	91.1	56.8		88.7	36.3			61.7								42		58.8	61.8		60.6
	50.4		71.4		94.6	80.8	37.8	57.1	36.5	35.6					86.4	88.6											44.3	34.4	90.5	54.2	83.5	54.7			52.8								39.2		80.1	40		65.9
	85.2		71.6		98	67.8	34.8	48.5	72.8	88.4					50.7	51.8											66.6	37.1	91.5	80.2	77	40.6			77.8								24		61.5	75.7	71.4	49.3
	30.6		44.1		57.8	67.1	43.3	24.7	133.6	30.1					87.8	38.7											72	27.8	92	84.9	37.2	39			22.2										30	56.8	69.4	43.9
	76.6		40.9		85.2	86.9	26.2	75.5	110.1	76.8					56.8	24.2											79.2	60.6	77.9	84.8	60.2	26.7			102.5										57	54.5	44.9	50
	59.4		68.8		78.8	26.2	39.2	37.6	92.5	50.6					73.6	38.7											61.4	48.9	73.7	67.3	46.9	56.5			36.5										39.2	71.9	32.2	44.7
	57.8		52.9		44.5	50.1	39.1	56.9	85.5	75.4					75.2	50.6											72.3	71.5	89.9	86.8	82.8	48.8			61.1										98.9	69.4	79	46.2
	51.6		40.1		99.7	71.9	59.8	76.6	82.2	85					61.9	33.5											64.2	44.4	84	75.5	67.2	26.9			76.1										73.1	59.7	67.5	38.2
	111.1		30.3		67.8	39.1	38.3	27.4	97.5	63.4					60.8	88											40.9	54.6	88.1	78.8	36.7				76.6										78.1	46.2		25.7
	80.6		64.2		94.3	57.2	49.8		106.1	68.5					52.4	23.6											59.7	48.5	87	56.3	26.2		27.3	98	58	120.1									56.9			39.2
	58.2		31.2		90.5	45.8	7.2		93.4						66	26.7											78.7	39.8		80.9	47.8		31.8	92.5	51.4	102.3
	49.2		41.9		45.1	50.1	22.1		94.3						95.6												55.2	27.3		81.8	43.1		24.6	129.1	68.4	110.8
	58.2		39.4		62.6	70.4	25.8		84.1						52.5												62.5	69.6		74.4	26.9		62.2	96.6	48.8	71.9									68.5		36.1
	67.5		40.7		46.3	76.4	13.4		64.8						48.4												34.7	80		63.9	26.4		52.3	77.4	40.9	24.5									42.7		32.1
	44.1		35		99.2	47.9	22.4		100.1						35.4												63.8	80.8		39.1	32.5		68.8	75.3	32.9	124.1									70.6		65
	76		33.1		52.9	48.6	43.8		83.7						69.4												37.1			61.9	57.9		43.4	166.4	57.1	121.2									45.7		55.7
	46.1		48.8		51.4	53.6	25.3		72.6						43.2												44			61.2	35.5		47.7	50.4	38.1	89.9									58.7		61.5
	35		56		35.2	25.1	20.3		70.4						22.8												86			78.9	55.2		70.9	85.6	58.7	128.3									82.5		47.9
	57.4		39.3		41.6		51.3		109.8						71.2												58.6			52.8	43.7		76.8	58.3	69.2	72.7									67.8		40.9
	33.5		20.6		53.9		82.8		121.6						27.3												38.3			58	66.2		57.5	59.5	40.5	120.2									64.4		49.7
	43.4		66.3		81.1		63.6		115.1						73												28.8			64.6	71.2		63.8	56.8	56.1	95.8									44.8		38.5
	104.4		42		74.4		26.3		87.5						31.3												31.8			81.8	69			89.5	33.1	31.9									77.7		90.7
	41.8		36.5		49.1		28.7		111						69.9												57.9			59.9	58				46.5	83									41.8		38.4
	68.3		23.1		65.3				100						80.3												41			76.2	80.1				33.3	117.6									38.1		63.5
	85.1		54.5		79.7				51.8																		51.5			87.4	54.2				39.7	39.7									37.1		41.7
	65		48		62.1				45																		26.5			73.8	78.3				78.5	38.4									30.4		49.5
	60		33.3		83.8				58.7																		50.8			46.1	40.6				69.1	39.2									30.8		64
	60.3		61.2						113.1																		36.8			66.8	72.8				46.1	52.5									43.5		44.8
			51.2						54.8																		56.9			31.9	56.4				49	31.6									60.1		36.3
			59.6						98.1																		27				67.2				44.6	56.7									49.3		20.9
			44.3						17.2																						70.8				76.5	49.6									76		40.4
			57.4						93.4																						68.6				63.4	24.8											26.5
			62.6						60.9																						70.8				46.7	41.4											73.7
			47.7						66.3																						83				50.5	57.6											58.4
			31.6						95.7																						23.6				27.7	43.8											33
			46.8						75.9																						39.2																29
			57.8						76.9																						52.3																45.5
			22.9						61.6																						20.4																34
			48						69.1																						49.6																65.8
			64.3						85.3																						45.1																57.7
			43.9						85.1																						41.6
			31.4						111.7																						42.6
									41.3																						60
									80.6																						54.6
									92.6																						37.5
									117.7
									103.2
									74.5
									94.5
									113
									112.9
[truncated: 43 more columns]

## Sheet: Per s cluster-period
Temp, Fly line Id	18 ,M7-M2,S47D	20 ,M7-M2,S47D	25 ,M7-M2,S47D	29 ,M7-M2,S47D	18 ,M28-F1,S47A	20 ,M28-F1,S47A	25 ,M28-F1,S47A	29 ,M28-F1,S47A	18 ,F15-F1,S47A	20 ,F15-F1,S47A	25 ,F15-F1,S47A	29 ,F15-F1,S47A	18 ,13.2WT	20 ,13.2WT	25 ,13.2WT	29 ,13.2WT	18 F1-F1596A	20 F1-F1596A	25 F1-F1596A	29 F1-F1596A	18 M16-F1596A	20 M16-F1596A	25 M16-F1596A	29 M16-F1596A	18 F30-M1 583-596A	20 F30-M1 583-596A	25 F30-M1 583-596A	29 F30-M1 583-596A	18 M3-F1 583-596A	20 M3-F1 583-596A	25 M3-F1 583-596A	29 M3-F1 583-596A	18 F2-F1583-596A	20 F2-F1583-596A	25 F2-F1583-596A	29 F2-F1583-596A	18 F2-M1583-596A	20 F2-M1583-596A	25 F2-M1583-596A	29 F2-M1583-596A	18 M8-F1589A	20 M8-F1589A	25 M8-F1589A	29 M8-F1589A
Legend	21.2	22.1	21.5	21.6	29.7	30.2	30.5	33.8	29.5	31.3	30.8	32.4	23	23.7	24.2	24.1	16.2	15.9	15.4	15.8	17.4	17.2	15.6	16	17.2	18.7	17.4	16.9	16.6	16.6	15.7	16.3	16.2	16.2	14.5	15.3	15.9	15.1	14.9	14.9	19.95	21.1	19.1	19.4
	21.4	22.1	22	21.7	29.5	30.2	31.4	32	28.2	29	31.9	33.1	23.5	24.7	24.6	24.1	16.7	15.1	15.4	15.6	17.6	16.5	15.6	15.7	19.1	17.7	16.9	17.9	17.3	17.3	16.8	16.4	15.2	15.2	14.6	15.2	15.7	15.8	15.5	15.3	22.2	20.7	20.1	19.6
	20.9	21.4	21.6	21.9	29	29.7	31	32.5	28	31.3	32	32.7	23.5	23.9	24.7	24.1	15.9	15.9	15.2	15.9	16.9	16.8	15.3	15.9	18	17.4	16.9	16.9	16.4	16.4	16.5	16.1	15.85	15.85	14.6	15.1	15.9	15.2	15.1	14.9	21.5	20.2	19.7	19.1
	21	21.7	21.4	21.9	29.7	30.5	29.9	31.5	29	31.8	32.6	32.8	23.2	23.7	24.4	23.6	16.2	16.4	15	15.8	17.8	16.7	15.5	15.7	18.2	18	16.7	16.4	16.6	16.6	15.9	15.9	15.9	15.9	15.1	15.2	15.6	16.3	15.3	15.2	20.9	20.9	19	19
	21.4	21.7	21.7	22	29.2	29.5	31.6	33.5	29.9	31.7	31	32.5	23.7	24.2	24.5	12		16.5	15.6	15.7	17.1	16.7	15.5	15.8	19.1	17.7	17.1	16.7	16.7	16.7	16.6	16.1	16.3	16.3	14.8	15.1	16.1	15.6	15.2	15.3	20.9	20.9	19.9	19.2
	21	21	21.7	21.9	29	30.1	31.7	32.7	29.4	30.7	31.5	33	24.1	24.2	24.2	23.9		15.7	14.9	15.8	17.4	17.3	15.7	16.3	18.2	18.2	17.4	17.2	16.9	16.9	17.2	16.4	16.4	16.4	14.9	15.4	15.45	15.3	16.1	15	21.9	20.2	19.8	20.1
	21.4	21.3	21.7	21.4	30.3	28.6	29.7	32	29.8	31.7	32.1	32	23.8	23	24	23.8		15.9	15.4	17.4	17	16.5	15.6	15.9	18.2	18.4	16.6	17.7	16.5	16.5	16.2	16.1	16.2	16	15.1	16.1	15.6	15.6	15.1	15.4	20.6	21.6	19.3	19.3
	20.4	21.6	21.7	22.3	29.4	30.3	30.8	32.7	30	32.5	31.7	33	23.7	23.7	24.5	24.2		16.2	14.85	15.3	33	16.6	15.5	15.9	18.2	17.6	17.4	16	17	17	16.2	16.1	15.7	15	14.9	15.4	16.3	15.8	14.8	15.1	21.4	20.2	19.3	19.3
	21.7	21.5	21.7	22.6	30	30.7	29	35.7	29.7	30.7	31.4	33.1	24	23.9	23.9	23.8		15.7	15.1	15.3	18.2	16.7	15.9	15.8	17.6	17	16.6	16.9	16.7	16.7	16.5	16.3	16.7	15.9	15.2	15.4	16.2	15.9	15.4	15.9	20.2	20.7	19.4	19.2
	21.2	22.1	21.5	22.2	29.3		29.7	33.6	29.5	33	32.1	32.1	23.5	23.9	24	23.7			15.1	15.8	17.9	17	15.7	15.4	17	18.2	16.9	17.1	17.3	17.3	17.7	16.1	15.9	15.7	15	15.2	15.9	15.9	15.1	15.2	18.9	20.4	19.6	19.7
	21.2	22.1	22	21.9	30.5		31.2	32.4	28.5	31.2	31.7	33.2	23.5	23.8	24	23.9			15.3	16.1	17	17.6	15.9	15.6	18.4	17	16.9	16.5	17.7	17.7	16.4	17.9	16.7	15	14.4	14.6	15.9	16.1	15	15.2	20.9	20.4	19.9	19.4
	20.7	22.1	21	22.4	30.2		29.3	34.3	29.5	31.3	30.9	32.5	24.1	24.5	24.4	23.9			15.3	15.6	16.2	16.9	15.8	15.7	18.2	17.2	16.4		16.6	16.6	16.3	16.1	15.6	15.9	15	15.6	16.9	15.7	15.1	15.1	20.2	20	19.6	19.1
	21.1	21.4	22.1	21.7	29.3		30.6	32.1	29	32.3	31.7	32.4	23.5	24.5	24	24.3			14.9	15.7	17.7	16.3	16.2	15.2	17.7	16.9	16.6		17.7	17	16.2	16.2	16.7	15.6	14.85	15.2	16	15.9	15.1	14.8	20.6	20.4	19.3	19.9
	20.95	21.9	21.7	21.8	27.7		30.4	32.6	31	31.7	31.2	32.8	24.2	23.4	23.7	23.7			14.85	15.7	17.4	16.3	15.3	15.4	17.9	17.9	16.9		16.8	17.2	16	15.7	15.9	15.8	14.9	15.9	15.9	15.9	15.3	14.7	21.8	20	19	19.4
	20.6	21.4	21.3	21.5	30		30.9	34	30.6	31.2	31.9	32.1	23.7	24.1	23.7	23.9			15.4	16.2	17.1	16.6	15.5	15.7	17.2	17.9	16.7		16.9	17.3	16.2	16.2	15.7	15.6	14.5	15.1	15.9	15.9	15	15	20.1	20.5	19.7	19.6
	20.4	21.9	21.2	21.4	30		30.2	33.2	30.7	31.5	32.2	32.7	23		24.1	23.9			15.3	15.1	16.6	17.1	15.4	15.7	18.7	17.2	17.2		17.7	16.7	16.2	16.1	15.8	15.6	15	15.1	15.9	16.3	15.6	14.9	21	20.2	19.7	19.4
	21.2	21.5	22	22.1	30.2		30.8	33.2	28.7	28.8	31.2	32	23.4		24.1	23.9			14.7	15.85	17.4	17.1	15.6	15.9	17.4	17.4	17.4		16.7	16.7	16.1	16.2	16	15.6	15.3	15.1	16.1	15.4	14.9	15.1	21.5	20.5	19.1	20.1
	21	22	22	21.4	30.7		30.7	32.9	28.5	32.3	31.3	33.2	24.4		23.7	23.9			15.2	16.2	16.7	16.6	15.3	15.3	17.9	17.1	16.6		17.2	17.5	16.9	16.9	15.7	15.6	15.1	15.1	16	15.5	15.6	15	20.9	21	19.6	19.4
	21.2	21.4	21.4	21.6	30.5		30.9	33.7	30.7	31.3	31.6	32	23.7		24.1	24.3			15.1	15.4	17.2	16.7	15.6	15.9	17.5	17.4	17.7		17.4	17.2	15.9	16.6	17.6	15.7	14.8	15.2	16	15.8	15.1	14.6	20.7	20.2	19.5	19.8
	21.3	21.4	21.2	21.7	29.8		30.5	33.5	29.5	30.8	31.9	32.5	23.7		24.9	24.1			14.85	15.4	18.4	16.4	15.5	15.6	17.3	18.2	17.3		17.8	17.1	16.8	16.2	16.4	15.9	15.3	15.2	16.5	15.5	14.6	14.8	20.5	20.6	19.7	19.4
	20.75	21.7	21.5	21.5	29.7		29.8	32.5	30.3	32.8	32	32.2	23.3		24.2	24.1			15.3	15.2	16.8	16.2	15.5	15.4	17.7	18.4	17.7		18	17.4	16.1	16.1	15.7	15.9	15.1	15.1	16.3		15.5	15.3	20.7	19.6	19.7	19.2
	20	21.9	21.9	21.9	30			32.8	30.3	31.9	31.5	32.7	23.8		24.8	23.8			15.2	15.1	17.3	17.1	15.4	15.8	18.1	17.3	17.1		18.4	17.3	16.3	16.1	15.9	15.9	15.3	14.8	16.3		15.7	15.1	20.6	19.7	19.9	19.3
	20.4	21.7	22	21.7	30.3			32.3	30.4	32.5	33	33.2	24		25.7	24			15	15.9	16.75	15.8	15.6	15.4	16.9	17.1	16.9		17.1	16.9	16.3	16.1	16.7		15.1	15.6	16.1				20.4	20.8	19.3	18.8
		21.7	22.1	21.7	31.2			33.6	30.6	32	31.4	33.5	24.1		23.9	24.3			14.95	16.4	16.8	17.3	15.5	15.9	17.1	17.9	16.9		16.9	17.1	15.6	16.2	16.3		15.4	15.4	16				21.4	20.8	19.6	19.1
		21.4	21.9	21.6	30.7			34	30.4	32	32.4	32.7	24		24.1	23.8			15.4	15.5	16	16.6	15.2	15.3	17.7	17.1	16.8		17.4		16.35	15.9	16		15.1	15.2	16.1				20.4	20.8	19.6	18.9
		21.6	22.2	21	30.7			30.7	30.5	31.7	31.4	32	25.2		24.6	24.1			15.2	15.9	17.2	16.5	15.2	15.6	17.8	18	17		17.1		15.8	16.1	15.9		15.3	15	15.6				20.4	21.2	19.6	19.8
		21.1	22.9	21.9	30			33.8	30.2	31.9	31.2	31.7	24.2		24.1	23.9			15.1	15.6	16.7	17.3	15.5	15.8	17.1	17.4	16.7		17.1		16.3	15.9	15.6		15.6		16.4				21.2	20.7	20	19.4
		20.9	21.7	21.2	30.2			32.5	30	31.9	32.3	31.8			24.2	24.1			15.3	16.3	16.9	16.7	15.6	16.1	18.1	18.4	16.4		17.3		16.5	15.9	15.7		14.2		16.6				19.5	20.5	19.5	19.8
		21	21.6	21.5				33.2	30.9	31	31	31.7			24.1	24.1			15.2	15.6	16.9	16.9	15.6	15.6	18.5	17.9	17.4		17.2		16.3	16.1	16.2		15.3		16.1				20.7	20.6	19.8	19.7
		22	22.2	21.6				32.5	30.4	31.7	31.4	32.5			24.4	24.1			15	15.8	16.8	16.6	15.2	16	17.2		32.7		16.4		15.7		16.4		14.8		15.9				21.1	20.6	19.7	19.6
		21	22.1	20.8				33.4	30	30.8	32	33.2			23.9	24.1			15.1	18.6	16.9	17.2	15.2	15.8	17.3		16.6		17.1		15.8		15.2		14.1		15.9				20.3	20.4	19.8	19.1
		21.3	21.9	21.7				31.7	29.7	33.5	30.9	32			24.1	24.2			15.2	17.1	16.6	16.8	15.4	15.7	17.3		16.9		17		16.9		16.8		15.2		15.4				20.7	20.5	19.1	19.9
		21.9	21.5	21.6				30.8		31.5	31.6	31.9			23.9	24.2			15.2	16.1	16.7	17.4	15.4		17.8		16.9		16		16		15.75		15.2		16.2				20.6	20.6	19.3	19.4
		21.2	21.9	21.7				31.2		32.2	31.3	33.3			24.2	23.7			14.9		16.7	17.4	15.4		17.5		17.2		17.8		16.6		15.9		15.3		16.1				20.9	20.7	19.8	19.4
		21.9	22.1	20.8				32.9		31	31.1	31.3			24.4	24.7			15.2		16.7	16.6	15.6		17.7				17.2		15.9		16.1		15.6		15.7				21.4	21	19.8	19.3
		21.5	22.4	21.7				33.5		30.6	31.5	32.8			24.1	24.7			15.3		17.2	16.7	15.5		18.4				17.4		16.1		15.1		14.5		16.2				21.2	21.4	19.6	18.9
		21.5	21.9	21.7				31.4		29	30.7	32			24.4	24.4			15.9		16.4	16.9	15.4		18.2				17.2		16.6		16.4		15		15.8				20.8	20.9	19.6	19.6
		21.2		21.5				32.8		29.9	31.8	32.2				24.1			14.8		16.8	17.3	15.3						17.8		15.7		15.7		14.85						21.2	21	19.3	19.4
		20.5		21.5				32.7		32.5	31.2	34				23.9			15		16.8	16.8	15.5						16.6				16.1		15.6						20.5	20.9	19.5	19.1
		20.7		22				33.2		29.2	31.5	31.3				23.9			15.1		17.2	16.9	15.3						17.1				15.7		15.1						21.1	21.3	19.8
		20.9		21.4				31		31.2	31.4	33				23.9			15.1		17	16.8	15.4						17.3				15.85		14.75						20.8	20.7	19.3
		20.8		21.7				31.8		30	31.1	32.7				23.9			15		16.3	17.6	15.7						33.7						15.2						20.3	19.2	20
		21.2		21.7				31.3		31.4	31.8	32.5				23.9			15.4		16.8	16.8	15.5						16.7						15.1						21.1	21	19.6
		21.7		21.5							31.7	32.2				24					17	17.1	15.6						15.9												20.8	20.9	19.5
		21.6		21.9							31.9	33				23.7					16.9		15.3						16.5												20.1	40.2	19.9
		21.5		21.6							31	33.1				24.1					16.2								17.1												19.7	20.4	19.6
		21.2		22.5								32				24.2					17								16.6												19.9
				21.4								32.8				24.3					16.6								17.3												20.3
												33				24.2					16.2								17.1												20.5
												33.2				24.3					17								16.9												20.2
												32.2				23.9					16.8								17.4												20.5
												32.3				24.2					16.4								17												20.6
												33.5				24.2					17.1								17.1												20.4
												32.2				23.9					16.6								17.2												20.3
												32.8				24					16.9								17.1												19.4
												32.6				24.2					16.8								16.7												20.6
												31.4				24.2					16.6								16.7
												34.2				24.6					17.1								16.6
												33				24.1					16.9								18.6
												32.3				23.7					16.9								16.9
												31.7				24.1					17.4								17.2
																24.4					16.5								17.4
																24.2													18.1
																23.7													16.6
																23.9													18.1
																24.2													17
																23.7													16.4
																24													17.2
																23.7													18.9
																23.1													16.7
																23.5													16.7
																23.9													16.6
																23.9													16.7
																23.2													16.6
																24													17.1
																													17.1
																													17
																													17
																													16.9

## Sheet: Per s cluster-power
	PER0,M7-M2,S47D				PER0,M28-F1,S47A				PER0,F15-F1,S47A				PER0,13.2WT				F1-F1596A				M16-F1596A				F30-M1 583-596A				M3-F1 583-596A				F2-F1583-596d				F2-M1583-596d				M8-F1589A
Temperature	29	25	20	18	29	25	20	18	29	25	20	18	29	25	20	18	29	25	20	18	29	25	20	18	29	25	20	18	29	25	20	18	29	25	20	18	29	25	20	18	29	25	20	18
	51.2	45	64.9	46.7	31.9	48.3	42.1	28.6	43.4	62.8	92.1	57.1	79.9	61.7	26.5	32.4	62.7	75.7	24.7	20.8	38.8	143.1	141.7	78.9	33.5	32	21.7	25.3	108.1	75.8	52.7	64.6	30.5	90.2	36.7	21.5	52.1	47.6	38.3	28.4	50.2	125	51.1	52.2
	67.8	59.5	51.1	29.1	20.5	31	27	32.4	61.9	37.6	29.7	45.2	101.9	68.1	27.9	49	49.8	68.6	23.2	40.6	66.4	133.3	112.3	104.1	23	55.1	40.7	33	107.6	81.5	82.1	114.2	76.2	90.8	24.8	54.9	64.3	82.9	41.1	53.6	94.7	113.1	55.7	39
	90.3	69	111.2	75.8	35.1	52.6	52.1	22.8	53.5	49.5	42.4	39.1	127.7	57.6	78.2	47.2	43	82.6	29.9	28.5	36.5	61.4	90.5	49.2	28.6	25.8	37.3	25	105.9	92.6	85.5	131.9	100.4	101.9	35.4	52.7	64.6	0.6	31.9	37.7	57.2	149.6	50.2	83.3
	73.9	46.7	43	28.9	80.1	22.7	36.7	32.3	58.4	63.7	57.3	48.1	119.6	58	24.4	31.6	77.2	137.5	33.5	35.7	109.8	49.7	102.9	67.8	74.5	39.4	33.1	41.5	81.2	68.1	91.6	54.5	37.2	56.8	79.5	63.1	59.4	68.2	53.7	31.9	60.6	33.3	75	41.8
	30.4	46.4	57.1	66.5	27.9	47.2	62.1	55.3	42.9	71.5	38.8	44.9	93	55.9	31	54.7	25.6	59.5	68.7		64.4	85.6	36.3	53.4	24.1	77.4	44	60.1	45	85.7	42.6	31	46.9	93.5	78	32.9	72.4	73.6	52	51.3	95.9	140.4	47.8	39.7
	80.6	63.8	20.3	22.5	25.5	30.8	45.2	23.6	61.8	71.2	63.2	52.2	78.2	52.6	47.3	75.6	101.6	99	29.3		31.9	89.9	86.5	77.2	23.4	25.7	40.2	42.1	62.9	27.6	100.3	39.9	70.8	97.8	75.5	32.2	43.8	93	44.1	21	106.9	126.3	20.4	31.7
	77.5	36.5	46.6	43.5	53.8	21.8	33.2	26	60.3	48	66	67	128.7	95	31.8	40.6	113.7	83.8	29.5		68.7	81.2	104.6	80.9	21.2	76.7	87.6	25.3	58.6	52.2	102.8	122.1	27.8	64.9	51.7	34	44.2	48.1	46	64.8	95.2	132	29.5	23
	108.7	31.4	98.2	41	32	25.1	31.4	23.8	51.8	53.6	23.7	38.6	111.5	86.9	21.8	71.1	105.2	118.8	53.1		82.5	120.7	59.8	43.8	29.5	43.8	50.7	25.3	53.9	101.5	80.6	46	92	115.6	36.9	87.8	83	81.8	90.3	83.3	74.2	128	52.4	82.3
	87.2	45.1	46	56.1	51.5	41.9	38.2	38.3	58.2	68.5	48.4	69.4	107	21.9	44.8	49.8	51	99.2	59.8		46.9	69.1	68.4	71.8	41.5	63.9	62.7	57.4	97.8	58.3	68.4	64	38.7	100.3	59.9	67.7	75.4	68	31.8	25.2	23.6	123.3	39.1	43.8
	90.6	35.7	78.7	35	50.9	53.8		27.9	48.7	74.1	29.3	20.9	128.6	37.7	38.2	34.2	95.6	94.6			69.6	89.2	60.3	56.5	34	21	51.3	33.7	67.3	89.9	96	96.4	35.6	96.2	46.2	44.9	50.8	90.6	35.8	59.9	34.6	124.4	32.1	33.9
	101.6	20.7	74.4	31.4	20.2	51.2		25.1	68.6	61	74.4	41.7	99.9	49.6	41.2	60.7	81	106.2			46.5	66	62.5	63.3		26	22.1	22.5	22.5	49.4	71.4	68.6	67	96.9	41.8	41.2	45.4	115.4	74	23.9	55	90.3	43.3	108.2
	47.5	43.5	82.1	27.7	64.7	55.8		25.9	58.6	62.8	32.9	30.7	97.2	20.2	22.7	57.2	90.4	84.3			39.6	94.1	52.8	24.1		66.1	30.7	33.1	58.6	62.7	90.9	59.7	38.9	58.8	64	87	72	25.4	22.4	103.1	87.4	114.7	67.4	47.2
	69.1	68.4	77	20.4	59.1	52.9		31	75.2	50.5	23.2	35.8	67.4	23.8	26.8	30.2	95.4	46.3			57.8	27.2	53.7	87.7		33.8	67.3	43.3	44.9	51.5	62	78.4	60.7	84.9	37.3	87	62.2	84.9	50.9	77.6	121	141.8	56.4	89.9
	101.8	68.4	62.9	29.8	54.1	63.1		30.4	69	58.5	42.8	35.1	96.4	35.6	27.6	37	58.7	94.3			77.7	78.4	21.7	71.3		26.3	27.9	72.4	33.4	120.7	101.9	47.4	32.1	86.3	74.4	41.9	46.9	95.7	94.3	57.7	87.6	102.9	28.6	68.2
	77.9	39.4	64.5	21	54.6	60.2		30.6	46.2	43.2	29.8	69	77.9	31.8	73.1	55	33.5	89			54.9	111.4	100	53		40.1	45.5	22.5	45.1	73.6	52.3	127.4	50.9	140.7	52.1	54.9	81.4	121.9	51.9	40.7	109.9	110.6	33.8	23.8
	59	65.3	45.5	64.9	72.9	39.7		26.2	46.9	52	60.8	65.6	93.5	78.8		20.6	55.7	70.9			86.7	79.8	104.3	47.4		49.5	26.3	41.7	64	48.7	51.8	80.5	87.9	78.5	67.3	32.2	48	40.6	71.9	93.9	122.4	38.7	104	68.5
	25.4	45.1	74.7	93.4	54.7	74.7		66.8	57.1	52	20.8	26.9	100.8	40.8		72	28.8	74.6			47.1	103.2	81.7	46.4		38.5	31	31.6	48.1	49.6	63.5	48.8	74.9	113.3	50.7	90.6	57.6	59.2	27.4	24.1	113	83.2	24.8	55.2
	54.9	69.3	39.5	80.6	73.2	28.2		24.5	45.7	23.5	35.9	33	69.1	38.8		41.8	72.8	80.4			113.7	128.9	95.2	62.6		70	47.6	82.6	20.7	57.8	79.8	71.8	79.7	37.7	50.5	65.4	34.6	58.9	72.4	46.1	108.8	123	100.1	94.5
	104.6	66.7	46.2	44	49.9	49.3		26.6	39.3	42.1	31.2	59.1	108.7	22.2		31.2	58.2	48.3			55.7	106.2	71.5	82.7		29.9	49.1	33.8	94.6	46	100	107.2	41.9	86.8	31.2	27.3	61.5	83	95.8	62.7	135.5	140.5	42	31.2
	40.7	63.5	53.8	58.8	39.6	68.2		34	62.8	43.6	70.9	46.3	78.3	84.8		75.7	36.8	77.7			99.8	105.5	47.8	29.6		61.5	32.3	43.3	55.6	65.3	91.1	54.6	47.6	97.6	91.1	57.4	54.1	104.6	77.7	67.3	103	120.3	81.2	79.8
	45.1	36.4	24.5	65.4	69.2	78.2		70.6	59.4	30.6	52.8	70.9	126.2	88.3		36.1	31.8	69.1			63.1	101.4	65.9	115		20.4	63.4	41.4	94.7	95.1	63.4	21.2	34.1	37.3	52	32.8	122	24.5		81.2	99.1	120.8	86.1	91.9
	64.7	77.9	84.6	93.1	27.8			32.8	50.9	21.3	25.6	25.7	100.5	45.8		36.9	95.6	94.8			77.7	86.1	66.8	99.4		35.5	36.6	40	69.9	43.3	114.6	70.2	74.6	103.9	77.2	31	55.3	84.9		82.5	106.7	125.7	45	47.2
	68.7	84.1	51.7	139.6	40.4			31.5	36	37.3	45.4	71.6	111	94.8		63.3	50.6	82.8			70.4	132.4	77.3	37.2		40.5	48.9	46.8	92.4	81	66.5	80.3	103.7	74		28		104		38.9	60.8	92.7	91.3	46.3
	104	84.3	57.4	47	20.5			48.2	60.6	37.8	56.6	77.6	77.5	75.1		126.2	102.1	81.6			33.8	118.6	104.2	92.2		31.9	56.5	29.4	54.7	62.3	41.7	86.5	98.4	97.1		23.7				63.1	115.4	85.4	115.5	81.4
	93.5	31.8	39.1	58.2	42.8			25.2	73.5	63.5	42.8	66	98.4	141.4		37.1	47.9	83			83.4	115.8	56.4	63.4		35.4	52.9	30.4	69	149.7	29.9	57.1	62.4	97.4		39.7				45.8	68.6	110.8	105	96.5
	48.4	27.7	74.9	23	21.4			37.9	76.2	64.2	66.3	60.1	93	159.2		50.8	41.2	27.5			38.5	130.3	88.9	111.8		54.7	46	60.7	56.7	114.5	68.4	88.3	50.1	86.9		52.2				21.8	118.4	133.2	77.4	50.7
	48.9	75.2	38.8		45.4			32.6	54.4	60.7	48	36.3	76.7	43.8		44.1	29.1	117.9			65.5	89.2	99.4	72.4		27.9	62	71	65.1	99.5	92.3	85.8		86.5		79.8				36.3	121.8	113.9	99	43.2
	63	78.8	39.5		31			34.7	53.1	28.9	31.2	38.5	70.6	75.8			85.5	90.1			53	105.8	40.9	47.9		40.5	25.3	52.7	80.4	115.4	107.4	78.2		35.4		139.1				60.7	104.3	111.8	66.5	48.6
	26.9	75.6	28.3		38.7				67.8	28.1	58.6	131.6	111.1	30.1			44.1	61.7			23.6	84.8	79.9	82.7		38.1	55	58.1	45.5	138.7	113.8	72.3		83.8		106.2				47.9	120.3	108.6	102.3	79.9
	72.3	126.1	22.9		52.2				59	48.6	22.5	67.7	88.4	73.9			63.6	73			50.6	104.4	42.9	114.5		36.8		34.3		36.9	92.4	38.9		103		52.4				51.7	142.3	130.7	105.4	75.6
	36.3	104.1	21.6		23.1				51.1	129.4	23.8	56.9	109	125.5			23.8	56.7			74.5	137.3	62.4	135.6		85.1		53.9		144.2	79.2	87.4		39.9		87.7				26.8	103	153.8	94.6	58.8
	54	99.9	52.7		31.1				50.8	98.6	51.5	35.6	44.8	108.2			67	76.4			37	127.7	84.6	81.2		95.1		94.5		123.7	93.7	61.7		75.1		50.2				25.9	49.8	140.4	65.9	94.3
	68.4	66.9	56.6		30.2				82.8	170.5	26.1		56.6	136.5			80.1	160.6				129	26.4	123		35.4		124.8		140.2	66.8	79		34.6		91.7				37.8	85.6	193.3	89.7	100.2
	40.9	90.2	43.2		60.8				61.2	119.3	43.7		83.5	34.8				124.5				121.9	97.3	113.3		36.8		25.1		45	76.8	99.8		137.2		42.8				21.7	63.6	190.6	87.7	34.4
	41.3	107.8	43.3		33.1				55.7	146.7	89.9		30.9	97.2				36.8				190.4	79.5	135.7				53.6		143.5	61.9	68		167.1		33.5				23.3	119.2	211.3	102.3	34.9
	25	50.3	43.4		72.5				55.3	55.8	21.7		68.1	56.1				105.4				92.4	130.9	141.6				130.4		86.1	66.1	118.9		115.1						32.3	49.9	120	100.3	34.8
	96.3	107.1	22.7		43.2				23.2	92.4	79.5		78.7					63.4				159	80.2	96.7				57.4		47.2	94.6	68.5		193.1							98.2	162.7	93.2	100.7
	36.5		51.2		66.1				49.6	144	20.8		77					109.6				212.3	104	77.6						31.9	96	83		130.1							39.1	177.8	66.7	72.7
	67.1		51.4		45.7				26.3	131.4	22.6		66.7					77.4				142.1	121.4	112.3								86.3		51.5							91	122.5	76.3	44.5
	20.6		42.8		22.7				48	115.9	46.5		65.2					94.4				154.1	85.5	117.4								98.8		89								139.2	105	95.9
	38.9		40.1		26				42.4	122.5	29.5		37.6					135.6				144.9	74.9	123.8								78.5		119								152.7	34.6	172.5
	71.7		42.2		31.1				56.7	172.8	39.6		71.9					120.4				203.5	91.3	97.3								95.2		157.8								177.2	36.1	175.5
	52.2		22.7						48.8	154.4			62					66.9				79.9	77.9	114.7								90		141.8								83.1	90.6	82
	49		27.7						49	110.7			33.5									165.4	69	54								70.1										165.5	33.1	138.3
	77.1		22.4						36.8	139.4			43.7									141.2		43.7								92.1										143.9	54.2	108.6
	33.1		51						68.9	164.7			105.5											39.1								108.8										134	72.6	41.4
	25.7		44.6						67.9				61.7											129.4								88.4												57
	66.4								70.4				99.5											95								112.6												120.9
									67.3				82.4											113.3								69.7												134.9
									36.4				82.8											64.9								103.5												138.3
									28.4				115.5											118.5								71.9												150.3
									43.8				35.3											92.3								163.9												112.7
									72.5				78.2											81.7								135.9												102
									34.3				96.9											86.1								127.7												134.8
									49.1				44.6											149.8								152.8												48.1
									42.8				87.6											119.7								158.6												71
									58.8				29.1											181.2								213.5
									39.7				104.4											118.3								175.2
									23				117.1											87.9								114.7
									67.9				93.8											117.1								140.2
									37.5				60.4											21.4								166
													58.7											158.5								165.6
													68.1																			69.3
													28.8																			143.7
													46.3																			141.8
													88.5																			133.1
													113.9
													45.2
													106.7
													62.3
													42.1
													67.1
													80.4
													81.8
													20.9
