# Supplementary material for: PERIOD Phosphoclusters Control Temperature Compensation of the Drosophila Circadian Clock
Source: Front Physiol. 2022 Jun 2;13:888262. doi: 10.3389/fphys.2022.888262 (PMC9201207; doi:10.3389/fphys.2022.888262)
Supplement: Supplementary file 2 [file DataSheet2.xlsx]

## Sheet: Figure_3
For graphing Fig 3B-F, 3J-K (Row 2-44)
	Rep 1				Rep 2				Rep 3
WT	Hyper-P	Hypo-P	Total	Hyper-P / Total	Hyper-P	Hypo-P	Total	Hyper-P / Total	Hyper-P	Hypo-P	Total	Hyper-P / Total
ZT4-18C	4.02646e+06	2.76591e+06	6792368	0.592791	9120594	5417748	14538342	0.627348	5085696	3408524	8494220	0.598724
ZT8-18C	5.00199e+06	3.53929e+06	8541280	0.585625	13865124	11906034	25771158	0.538009	5676387	5471234	11147621	0.509202
ZT12-18C	4.96937e+06	4.94009e+06	9909460	0.501477	17429622	16904139	34333761	0.507653	7859153	9567414	17426567	0.450987
ZT16-18C	6.5913e+06	7.47511e+06	14066404	0.468584	20667444	23010519	43677963	0.473178	10421265	11630253	22051518	0.472587
ZT20-18C	9318716	3427908	12746624	0.731073	19173462	16823940	35997402	0.532635	14366601	9507429	23874030	0.601767
ZT24-18C	1.10464e+07	2.91068e+06	13957064	0.791455	21001092	14041797	35042889	0.599297	12192736	5761441	17954177	0.679103
ZT4-29C	9.92478e+06	4.60794e+06	14532716	0.682927	17721186	12888435	30609621	0.578942	10228668	16280488	26509156	0.385854
ZT8-29C	7390724	8160900	15551624	0.475238	17068380	13714827	30783207	0.55447	11544640	15609129	27153769	0.425158
ZT12-29C	9.8983e+06	1.13506e+07	21248920	0.465826	22059282	20501103	42560385	0.518306	13998177	20788393	34786570	0.402402
ZT16-29C	8.9514e+06	1.65145e+07	25465924	0.351505	19732818	22769502	42502320	0.464276	11914268	21593181	33507449	0.355571
ZT20-29C	1.19406e+07	1.0743e+07	22683672	0.526397	26555592	20830530	47386122	0.560409	21023302	20244701	41268003	0.509433
ZT24-29C	1.34389e+07	5.47965e+06	18918504	0.710355	32583264	11478369	44061633	0.739493	23980068	8040742	32020810	0.74889
	Rep 1				Rep 2				Rep 3
S45A	Hyper-P	Hypo-P	Total	Hyper-P / Total	Hyper-P	Hypo-P	Total	Hyper-P / Total	Hyper-P	Hypo-P	Total	Hyper-P / Total
ZT4-18C	10482960	5010880	15493840	0.676589	10022656	12618701	22641357	0.44267	6470316	4197024	10667340	0.606554
ZT8-18C	7806816	4609424	12416240	0.628758	7644550	10484760	18129310	0.421668	5399712	5991624	11391336	0.474019
ZT12-18C	4838064	4899824	9737888	0.496829	10502902	11133219	21636121	0.485434	5524344	8236224	13760568	0.401462
ZT16-18C	9059328	8123200	17182528	0.527241	10191010	17426895	27617905	0.369	4959108	8030880	12989988	0.381764
ZT20-18C	7914144	6192880	14107024	0.561007	11802969	20406601	32209570	0.366443	8158752	14492880	22651632	0.360184
ZT24-18C	10785024	4962512	15747536	0.684871	16696280	17532880	34229160	0.487779	8659368	8733528	17392896	0.497868
ZT4-29C	13684464	7081744	20766208	0.658978	18411451	14438682	32850133	0.560468	9759024	12949560	22708584	0.42975
ZT8-29C	9995808	7605744	17601552	0.567894	19156213	12901406	32057619	0.597556	15499656	18750708	34250364	0.45254
ZT12-29C	6449952	7928080	14378032	0.448598	18959001	18864296	37823297	0.501252	8691696	13190400	21882096	0.397206
ZT16-29C	6465264	10675584	17140848	0.377185	19819994	35484577	55304571	0.358379	11609244	24858180	36467424	0.318346
ZT20-29C	9320160	11749952	21070112	0.44234	8658763	16745254	25404017	0.340842	12366900	21375828	33742728	0.366506
ZT24-29C	12809088	9853152	22662240	0.565217	20010908	26413671	46424579	0.431041	19576908	22394916	41971824	0.46643
S47A	Hyper-P	Hypo-P	Total	Hyper-P / Total	Hyper-P	Hypo-P	Total	Hyper-P / Total	Hyper-P	Hypo-P	Total	Hyper-P / Total
ZT4-18C	58261990	19403214	77665204	0.750169	35993752	12077152	48070904	0.748764	21776508	7260357	29036865	0.749961
ZT8-18C	61449330	19824850	81274180	0.756074	36839992	13100767	49940759	0.737674	26646282	7896642	34542924	0.771396
ZT12-18C	63467810	19874622	83342432	0.761531	38265614	13908350	52173964	0.733424	27021345	8189922	35211267	0.767406
ZT16-18C	70967374	22919178	93886552	0.755884	38764027	15295745	54059772	0.717059	25609662	9095814	34705476	0.737914
ZT20-18C	71983560	22654494	94638054	0.76062	42888888	15104008	57992896	0.739554	28650453	9956427	38606880	0.742107
ZT24-18C	70799106	22218828	93017934	0.761134	37659142	12123119	49782261	0.756477	30421638	9540882	39962520	0.761254
ZT4-29C	82880638	24280410	107161048	0.773421	37365366	11605313	48970679	0.763015	33608367	11409723	45018090	0.746552
ZT8-29C	76512030	24674952	101186982	0.756145	50496018	15557185	66053203	0.764475	41356419	13297713	54654132	0.756693
ZT12-29C	81027482	26110060	107137542	0.756294	56804032	16787458	73591490	0.771883	45950892	13925340	59876232	0.767431
ZT16-29C	84515846	25084766	109600612	0.771126	64172469	17950092	82122561	0.781423	47936031	13035165	60971196	0.786208
ZT20-29C	76246196	25147786	101393982	0.75198	52411539	16212892	68624431	0.763745	41026596	11454339	52480935	0.781743
ZT24-29C	73175650	25608200	98783850	0.740765	60122084	13683030	73805114	0.814606	49205004	13260000	62465004	0.787721
For graphing Fig 3G-H (row 46-76)
Hyper-phosphorylated isoforms
	Rep 1		Rep 2		Rep 3			Rep 1		Rep 2		Rep 3
WT	Hyper-P	Hyper-P: 29˚C/18˚C	Hyper-P	Hyper-P: 29˚C/18˚C	Hyper-P	Hyper-P: 29˚C/18˚C	S47A	Hyper-P	Hyper-P: 29˚C/18˚C	Hyper-P	Hyper-P: 29˚C/18˚C	Hyper-P	Hyper-P: 29˚C/18˚C
ZT4-18C	6315387	1.24662	12322002	1.19894	7656928	1.09796	ZT4-18C	28311114	1.23921	26994712	0.982386	15631395	1.48632
ZT8-18C	6819267	1.14833	13227312	1.00403	6948600	1.18304	ZT8-18C	28421744	1.17758	29239355	1.18576	18552183	1.48519
ZT12-18C	7837830	0.9989	13960590	1.14147	7594842	1.19451	ZT12-18C	27297642	1.44635	30006131	1.30259	19233123	1.59636
ZT16-18C	7137312	0.886846	15082074	0.84532	7365368	1.05305	ZT16-18C	32680930	1.28639	28612587	1.61033	17718753	1.83367
ZT20-18C	7517874	0.936078	14737338	0.967557	8302615	1.35065	ZT20-18C	29419254	1.33604	29967130	1.2596	19463340	1.47658
ZT24-18C	9318972	0.90197	15015042	1.06805	8089976	1.40733	ZT24-18C	25931048	1.48101	26410213	1.51828	20976306	1.6075
ZT4-29C	7872891		14773374		8407029		ZT4-29C	35083320		26519218		23233197
ZT8-29C	7830771		13280568		8220475		ZT8-29C	33468880		34670900		27553500
ZT12-29C	7829211		15935556		9072141		ZT12-29C	39481938		39085624		30702945
ZT16-29C	6329700		12749184		7756088		ZT16-29C	42040457		46075833		32490393
ZT20-29C	7037316		14259210		11213886		ZT20-29C	39305436		37746647		28739256
ZT24-29C	8405436		16036818		11385233		ZT24-29C	38404250		40098145		33719415
Hypo-phosphorylated isoforms
	Rep 1		Rep 2		Rep 3			Rep 1		Rep 2		Rep 3
WT	Hypo-P	Hypo-P: 29˚C/18˚C	Hypo-P	Hypo-P: 29˚C/18˚C	Hypo-P	Hypo-P: 29˚C/18˚C	S47A	Hypo-P	Hypo-P: 29˚C/18˚C	Hypo-P	Hypo-P: 29˚C/18˚C	Hypo-P	Hypo-P: 29˚C/18˚C
ZT4-18C	6209280	1.20076	9342480	1.80307	8813753	2.6708	ZT4-18C	19403214	1.25136	12077152	0.960931	7260357	1.57151
ZT8-18C	7139792	1.62174	15424164	1.132	11062739	2.07435	ZT8-18C	19824850	1.24465	13100767	1.1875	7896642	1.68397
ZT12-18C	9258920	1.52924	20416662	1.23211	15641594	1.76813	ZT12-18C	19874622	1.31374	13908350	1.20701	8189922	1.7003
ZT16-18C	11319176	1.748	26159658	1.03795	18418491	1.61054	ZT16-18C	22919178	1.09449	15295745	1.17353	9095814	1.43309
ZT20-18C	7652524	1.89297	20199228	1.24553	17359530	1.65756	ZT20-18C	22654494	1.11006	15104008	1.07342	9956427	1.15045
ZT24-18C	5933884	1.50588	17063172	0.943539	12986430	1.24668	ZT24-18C	22218828	1.15255	12123119	1.12867	9540882	1.38981
ZT4-29C	7455844		16845108		23539791		ZT4-29C	24280410		11605313		11409723
ZT8-29C	11578908		17460198		22947939		ZT8-29C	24674952		15557185		13297713
ZT12-29C	14159068		25155480		27656353		ZT12-29C	26110060		16787458		13925340
ZT16-29C	19785964		27152454		29663679		ZT16-29C	25084766		17950092		13035165
ZT20-29C	14485988		25158714		28774482		ZT20-29C	25147786		16212892		11454339
ZT24-29C	8935740		16099776		16189930		ZT24-29C	25608200		13683030		13260000

## Sheet: Figure_4
		Rep 1								Rep 2								Rep 3
	25C	Hyper PER	Scale to 1	Hypo PER	Scale to 1	Total PER	Ponceau 70kD (adjusted)	Total PER Normalize to Ponceau	Scale to 1	Hyper PER	Scale to 1	Hypo PER	Scale to 1	Total PER	Ponceau 70kD (adjusted)	Total PER Normalize to Ponceau	Scale to 1	Hyper PER	Scale to 1	Hypo PER	Scale to 1	Total PER
WT	0	7969455	0.353946	40819090	1	48788545	15614390	3.12459	1	2804868	0.24272	29487414	1	32292282	12784710	2.52585	1	2533140	0.257824	25191360	1	27724500
	6	22516000	1	13253240	0.324682	35769240	12118329	2.95166	0.944657	9243762	0.79991	11683452	0.396218	20927214	13201904	1.58517	0.627577	9825087	1	8166192	0.324166	17991279
	12	8242910	0.366091	3393910	0.0831452	11636820	14619227	0.795994	0.254752	11556006	1	5798496	0.196643	17354502	12581096	1.37941	0.546117	1635540	0.166466	629400	0.0249848	2264940
	24	9431695	0.418889	3069690	0.0752023	12501385	14455350	0.864828	0.276781	5703390	0.493543	1964622	0.0666258	7668012	14760588	0.519492	0.20567	299584	0.0304917	372806	0.014799	672390
S47A	0	5475925	0.375519	14900015	1	20375940	11773072	1.73072	0.970628	2389266	0.106214	14970780	1	17360046	13231754	1.312	0.657419	2954944	0.257551	12921344	1	15876288
	6	14582295	1	6250985	0.419529	20833280	11683760	1.7831	1	16103010	0.715852	9648078	0.644461	25751088	13252213	1.94315	0.97368	11473245	1	2591145	0.200532	14064390
	12	11271590	0.772964	2673495	0.179429	13945085	13592429	1.02595	0.575372	22494900	1	4888740	0.326552	27383640	13721454	1.99568	1	7513048	0.654832	632196	0.0489265	8145244
	24	12981436	0.890219	2500894	0.167845	15482330	15516376	0.997806	0.559591	11734404	0.521647	885720	0.0591633	12620124	14404653	0.876114	0.439005	466830	0.0406886	251230	0.019443	718060
S45A	0	3269198	0.383646	14313612	1	17582810	14346329	1.2256	1	2038920	0.0852215	13821145	1	15860065	14868360	1.0667	0.496623	3273534	0.551188	28061154	1	31334688
	6	8521395	1	6051038	0.422747	14572433	12899760	1.12967	0.921728	17524520	0.732479	5090410	0.368306	22614930	15258765	1.48209	0.690018	5715822	0.962414	8943021	0.318698	14658843
	12	7744463	0.908826	2379840	0.166264	10124303	11206188	0.903456	0.737157	23924940	1	3210870	0.232316	27135810	12633610	2.14791	1	5939050	1	4936360	0.175914	10875410
	24	7754714	0.910029	2200146	0.15371	9954860	13594236	0.732285	0.597493	5963750	0.249269	592540	0.042872	6556290	20844864	0.314528	0.146435	235290	0.0396174	259594	0.00925101	494884
S45Y	0	3021566	0.395513	28770939	1	31792505	11190752	2.84096	1	4776655	0.249109	29993600	1	34770255	13144824	2.64517	1	2046798	0.163376	14044212	1	16091010
	6	7639608	1	12269241	0.426446	19908849	11227936	1.77315	0.624138	12228905	0.637753	6329765	0.211037	18558670	13361280	1.38899	0.525104	8085409	0.645381	6398520	0.455598	14483929
	12	5455944	0.714165	3949851	0.137286	9405795	14145614	0.664927	0.23405	19174984	1	4392183	0.146437	23567167	13399575	1.7588	0.664911	12528114	1	3625107	0.258121	16153221
	24	7091280	0.928226	3292782	0.114448	10384062	14628646	0.709844	0.249861	6011850	0.313526	547105	0.0182407	6558955	19351265	0.338942	0.128136	350486	0.027976	254572	0.0181265	605058
		Rep 1								Rep 2								Rep 3
	18C	Hyper PER	Scale to 1	Hypo PER	Scale to 1	Total PER	Ponceau 70kD (adjusted)	Total PER Normalize to Ponceau	Scale to 1	Hyper PER	Scale to 1	Hypo PER	Scale to 1	Total PER	Ponceau 70kD (adjusted)	Total PER Normalize to Ponceau	Scale to 1	Hyper PER	Scale to 1	Hypo PER	Scale to 1	Total PER
WT	0	2501780	0.218249	29384324	1	31886104	12721024	2.50657	0.991585	3306355	0.385715	23794680	1	27101035	15048864	1.80087	1	7044264	0.247704	54926136	1	61970400
	6	10317799	0.900099	24117119	0.820748	34434918	13622275	2.52784	1	5891340	0.687277	11568050	0.486161	17459390	14789709	1.18051	0.655522	14512400	0.510312	28136235	0.512256	42648635
	12	11462963	1	10440074	0.355294	21903037	12164055	1.80064	0.712322	8424130	0.982749	9414535	0.395657	17838665	15431977	1.15595	0.641887	28438281	1	25051071	0.456087	53489352
	24	8843531	0.771487	3528421	0.120078	12371952	12748516	0.970462	0.38391	8572005	1	6083090	0.255649	14655095	13977054	1.04851	0.582225	12500304	0.439559	6629796	0.120704	19130100
S47A	0	4595731	0.163022	16907517	1	21503248	10666800	2.0159	0.725654	4104620	0.26943	15847065	1	19951685	12440478	1.60377	1	11376981	0.157943	47840331	1	59217312
	6	18190232	0.645251	16559117	0.979394	34749349	12508535	2.77805	1	8576100	0.562942	14406925	0.909123	22983025	15444472	1.48811	0.92788	33654220	0.467212	29594824	0.618617	63249044
	12	26936814	0.955514	8016885	0.474161	34953699	14614144	2.39177	0.860953	15234440	1	8397285	0.529895	23631725	15287970	1.54577	0.963836	72031968	1	22791591	0.47641	94823559
	24	28190920	1	3282933	0.19417	31473853	13318020	2.36325	0.850687	14286415	0.937771	4329000	0.273174	18615415	16234872	1.14663	0.714959	42825180	0.59453	6942180	0.145111	49767360
S45A	0	2115425	0.286379	26220220	1	28335645	14485536	1.95613	0.877492	4693392	0.365797	22437162	1	27130554	14214033	1.90872	1	172494	0.00876474	37588005	1	37760499
	6	7386795	1	20868185	0.795881	28254980	12674750	2.22923	1	8567922	0.667773	12132714	0.540742	20700636	16167150	1.28041	0.670824	19680440	1	23458175	0.624087	43138615
	12	6531655	0.884234	10322195	0.393673	16853850	13255452	1.27147	0.57036	11857956	0.924194	8084010	0.360296	19941966	16552512	1.20477	0.631194	8424372	0.428058	5347056	0.142254	13771428
	24	6564415	0.888669	5156840	0.196674	11721255	13526143	0.866563	0.388727	12830598	1	6425628	0.286383	19256226	16622254	1.15846	0.606932	5235130	0.266007	2180854	0.0580199	7415984
S45Y	0	2507895	0.164007	39243360	1	41751255	12010075	3.47635	1	6606996	0.382477	26033634	1	32640630	15601131	2.0922	1	6047320	0.462539	32898253	1	38945573
	6	11353095	0.742451	25438465	0.648223	36791560	11952256	3.07821	0.885471	13251282	0.767112	12308076	0.472776	25559358	15060530	1.69711	0.811161	13074179	1	15103006	0.459082	28177185
	12	14838525	0.970385	13530140	0.344775	28368665	12205288	2.32429	0.668601	17274246	1	7092162	0.272423	24366408	16653694	1.46312	0.699324	266995	0.0204215	9470651	0.287877	9737646
	24	15291380	1	5929560	0.151097	21220940	14599572	1.45353	0.41812	13338864	0.772182	5273202	0.202553	18612066	19228196	0.967957	0.462651	4394084	0.336089	1245195	0.0378499	5639279
		Rep 1								Rep 2								Rep 3
	29C	Hyper PER	Scale to 1	Hypo PER	Scale to 1	Total PER	Ponceau 70kD (adjusted)	Total PER Normalize to Ponceau	Scale to 1	Hyper PER	Scale to 1	Hypo PER	Scale to 1	Total PER	Ponceau 70kD (adjusted)	Total PER Normalize to Ponceau	Scale to 1	Hyper PER	Scale to 1	Hypo PER	Scale to 1	Total PER
WT	0	1171028	0.111654	18863064	1	20034092	16867875	1.18771	0.988803	3491862	0.329832	15401298	1	18893160	14143360	1.33583	1	3059900	0.356939	28260650	1	31320550
	6	10487980	1	8675780	0.459935	19163760	15954432	1.20116	1	9839412	0.929404	7593564	0.493047	17432976	14815136	1.1767	0.880874	8572616	1	7080958	0.250559	15653574
	12	9088744	0.866587	3126368	0.16574	12215112	13490532	0.905458	0.753822	10586796	1	5171430	0.335779	15758226	15599000	1.01021	0.756238	566848	0.0661231	536996	0.0190015	1103844
	24	4674456	0.445697	966484	0.0512369	5640940	11686413	0.482692	0.401856	6364644	0.601187	2851530	0.185149	9216174	13691007	0.673155	0.503922	377024	0.04398	406144	0.0143714	783168
S47A	0	1185376	0.0378122	12224768	1	13410144	15986298	0.838852	0.397668	2995014	0.110108	12997974	1	15992988	15213330	1.05125	0.44474	3415386	0.434203	20678424	1	24093810
	6	13978488	0.445898	6834272	0.559051	20812760	12888315	1.61486	0.765542	9511260	0.349669	7710120	0.593179	17221380	16290036	1.05717	0.447246	7865867	1	3125416	0.151144	10991283
	12	31349058	1	3536202	0.289265	34885260	16537787	2.10943	1	27200778	1	6721506	0.51712	33922284	14351125	2.36374	1	2918500	0.371033	873535	0.0422438	3792035
	24	23869292	0.761404	1212304	0.0991679	25081596	17496229	1.43354	0.679589	25697034	0.944717	3789852	0.291573	29486886	16827867	1.75227	0.741311	365211	0.0464298	256410	0.0123999	621621
S45A	0	1884496	0.0629998	22814592	1	24699088	17401160	1.41939	0.507214	4932658	0.318246	22795354	1	27728012	16345962	1.69632	1	2966528	0.226396	22831616	1	25798144
	6	22445508	0.750367	16341828	0.716288	38787336	14348375	2.70326	0.965997	11839582	0.763868	7698788	0.337735	19538370	18259868	1.07002	0.630787	13103285	1	8128120	0.356003	21231405
	12	29912724	1	8456752	0.370673	38369476	13711170	2.79841	1	15499504	1	4987838	0.218809	20487342	14568813	1.40625	0.828997	335465	0.0256016	292305	0.0128026	627770
	24	8833540	0.29531	1971864	0.0864299	10805404	13260753	0.814841	0.29118	13269860	0.856147	5097020	0.223599	18366880	11903880	1.54293	0.909575	271782	0.0207415	340515	0.0149142	612297
S45Y	0	3051704	0.109131	27626020	1	30677724	15163340	2.02315	0.860265	3369452	0.230857	19647676	1	23017128	16076750	1.4317	1	3246342	0.334101	25313442	1	28559784
	6	19084472	0.682471	12803312	0.463451	31887784	15188217	2.09951	0.892733	7659678	0.5248	11662482	0.593581	19322160	17570574	1.09969	0.768098	9716656	1	4242520	0.167599	13959176
	12	27963776	1	9206996	0.333273	37170772	15805398	2.35178	1	14595420	1	8747084	0.445197	23342504	17399552	1.34156	0.937036	1712587	0.176253	514426	0.0203222	2227013
	24	12591628	0.450284	2885852	0.104461	15477480	15684690	0.986789	0.419593	10594870	0.725904	5796194	0.295007	16391064	16389846	1.00007	0.698521	407025	0.0418894	253528	0.0100155	660553

## Sheet: Figure_5
		Rep 1					Rep 2				Rep 3
	18C	Total PER	Ponceau 70kD (adjusted)	Total PER Normalize to Ponceau	Scale to 1	Total PER	Ponceau 70kD (adjusted)	Total PER Normalize to Ponceau	Scale to 1	Total PER	Ponceau 70kD (adjusted)	Total PER Normalize to Ponceau	Scale to 1
WT	0	5172174	66498642	0.0777786	1	11206520	35438175	0.316227	0.977434	11590032	53110096	0.218227	1
	6	5067027	70641270	0.071729	0.92222	12015315	37138400	0.323528	1	11797918	57948166	0.203594	0.932949
	12	3697155	67672962	0.0546327	0.702412	7977255	28849990	0.276508	0.854665	8122806	67583838	0.120189	0.550751
	24	2198385	64663956	0.0339971	0.4371	5134610	29054520	0.176723	0.546238	5762342	69724086	0.0826449	0.378712
S47A	0	7096005	66958416	0.105976	1	15393950	31575375	0.48753	1	13094028	69520942	0.188347	0.762963
	6	3470544	58564548	0.0592602	0.559183	9283885	37598694	0.24692	0.506472	15671802	63484108	0.246862	1
	12	2801169	61763058	0.0453535	0.427959	6731530	38047549	0.176924	0.362899	6877412	60410416	0.113845	0.461168
	24	944622	57126888	0.0165355	0.15603	4597255	39380434	0.11674	0.239451	3258224	59295938	0.0549485	0.222588
	29C	Total PER	Ponceau 70kD (adjusted)	Total PER Normalize to Ponceau	Scale to 1	Total PER	Ponceau 70kD (adjusted)	Total PER Normalize to Ponceau	Scale to 1	Total PER	Ponceau 70kD (adjusted)	Total PER Normalize to Ponceau	Scale to 1
WT	0	6158016	54618850	0.112745	1	16738200	36523652	0.458284	1	6229888	73710260	0.0845186	1
	6	2991872	64585430	0.0463243	0.410875	6253440	37484500	0.166827	0.364026	5688768	76900460	0.0739757	0.87526
	12	3133184	64794080	0.048356	0.428896	4811760	41136692	0.11697	0.255235	4841472	75891790	0.0637944	0.754797
	24	3322240	53561040	0.0620272	0.550153	3560880	38035820	0.0936191	0.204282	3625472	74926150	0.0483873	0.572504
S47A	0	14032576	50788270	0.276296	1	11560320	40840800	0.283058	1	9924672	70166330	0.141445	1
	6	15234624	68420950	0.22266	0.805877	7389840	47360280	0.156035	0.551246	8447680	70047900	0.120599	0.852619
	12	3274880	59371650	0.055159	0.199638	4446300	39195532	0.113439	0.400762	5014720	70158660	0.0714768	0.505333
	24	2782464	54791230	0.050783	0.1838	3135780	42770052	0.0733172	0.259018	2174400	64180480	0.0338795	0.239524
